# Supplementary material
Source: PubMed Central journal article supplement (PMC8378307)
Supplement: NIHMS1728323-supplement-Supplemental_Data_File.pdf [file NIHMS1728323-supplement-Supplemental_Data_File.pdf]

## **SUPPLEMENTAL DATA DESCRIPTION**

The supplemental data contains 4 figures, 3 videos, 3 tables, and 1 file containing the figure/table/video legends.

### **Supplementary Figure Legends:**

#### **supplementary figure 1: Expression of *LAMA1* and other laminin subunits**

(A) Quantitative real-time PCR results for *LAMA1* mRNA expression in multiple Human tissue cDNA panels (human MTC panels I and II and Human Fetal MT Panel; Clontech Laboratories, Mountain View, CA). Y axis represents the normalized relative expression of *LAMA1*.

(B) mRNA expression analysis of *LAMB1*, *LAMB2*, *LAMC1* in Control, Patient 2, and Patient 3 fibroblasts by quantitative real-time PCR. Expression levels of *LAMB1*, *LAMB2*, *LAMC1* are lower in Patient 2 and Patient 3 as compared to Control. Error bars represent S.D. (n=5). \*,  $P<0.05$ ; \*\*,  $P<0.01$  (Mann-Whitney test to compare Patient 2 or Patient 3 to control).

#### **supplementary figure 2. Optimization of *LAMA1* siRNA knockdown**

To optimize the siRNA to be used in the study, we compared *LAMA1* expression using different concentration of non-targeting and *LAMA1* siRNA. Since 0.6  $\mu$ M showed the most efficient and consistent knockdown, it was used to assess evaluation of *LAMA1* deficiency in cells.

#### **supplementary figure 3. Overexpression of full-length wild type *LAMA1* rescues cell phenotype associated with *LAMA1* deficiency.**

Rescue experiments were performed by stable transduction of wild type *LAMA1* (pLenti-*LAMA1*) in control, Patient 2, and Patient 3 fibroblasts.

(A) Recovery of *LAMA1* protein expression in Patient 2 and Patient 3 after transduction was done using immunoblotting. Vinculin (VCL) was used as loading control.

(B) Equal numbers of control and Patient 2 and 3 fibroblasts were plated on wells coated with either bovine serum albumin (BSA) or collagen-I (Col-I) or laminin-111 and allowed to attach (See also Figure 4A). Control and patients' fibroblast were transduced with a lentiviral vector containing the wild type form of *LAMA1* (pLenti-*LAMA1*) After 24 hours, cells were

trypsinized and transferred to non-coated wells and allowed to attach. OD values represent amounts of DNA in cells that remain attached to the wells after 90 minutes of incubation.

(C) Equal number of control Patient 2, and Patient 3 fibroblasts were seeded on culture wells and allowed to form a monolayer and grow to confluency, after which a 0.9 mm scratch was made. “Wound” closure was monitored by imaging cells stained with Calcein AM after 12, 24, and 36, 48, and 60 hours. Percent closure and migration rates were calculated from 6 experiments. Scale bar represents 100 $\mu$ m. “-“ indicates that cells were transduced with pLenti-Empty construct, while “+” indicated transduction with pLenti\_LAMA1 that contains full length *LAMA1*. \* shows statistical significance between Patient 2 or Patient 3 and Control cells. (D) Apoptosis was quantified using Caspase-3/7 activity measurement at 30 hours after plating control (white bars), Patient 2 (light grey bars) cells, and Patient 3 (dark grey bars) with or without the addition of the known apoptosis inducer, Staurosporine. Results show an increased susceptibility of patients’ cells to apoptosis at baseline and recovery after transduction with pLenti\_LAMA1 that contains wild type *LAMA1*. “-“ indicates that cells were transduced with pLenti-Empty construct, while “+” indicated transduction with pLenti\_LAMA1 that contains wild –type *LAMA1*.

(E) GTPase activation assay of Cdc42 in control, Patient 2 and Patient 3 fibroblasts. Results show a significant recovery of the activated form (GTP bound) of Cdc42 in Patient 2 and Patient 3 fibroblasts after transduction with pLenti\_LAMA1 containing wild type *LAMA1*.

For (B-E), error bars represent S.D. for experimental replicates (3 replicates for B, D, and E; 6 replicates for C). Analysis was done comparing patient cells transduced with pLenti-Empty and control, or patient cells transduced with pLenti-LAMA1 and control. \* indicates  $P < 0.05$ , Mann-Whitney test.

#### **supplementary figure 4. LAMA1 immunoblot additional data.**

(A) Full immunoblot images for LAMA 1 and vinculin (shown in figure 2C). Corresponding molecular weight is shown in the ladder (HiMark Pre-stained Protein Standard).

(B) Full immunoblot images for LAMA 1 and vinculin (shown in supplementary figure 2A). Corresponding molecular weight is shown in the ladder (HiMark Pre-stained Protein Standard).

(C) LAMA1 antibody competition assay with laminin-111 protein, showing specificity of LAMA1 antibody used in this study. A total of 8  $\mu$ g laminin-111 peptide was used.

# Supplementary Figure 1

**A**

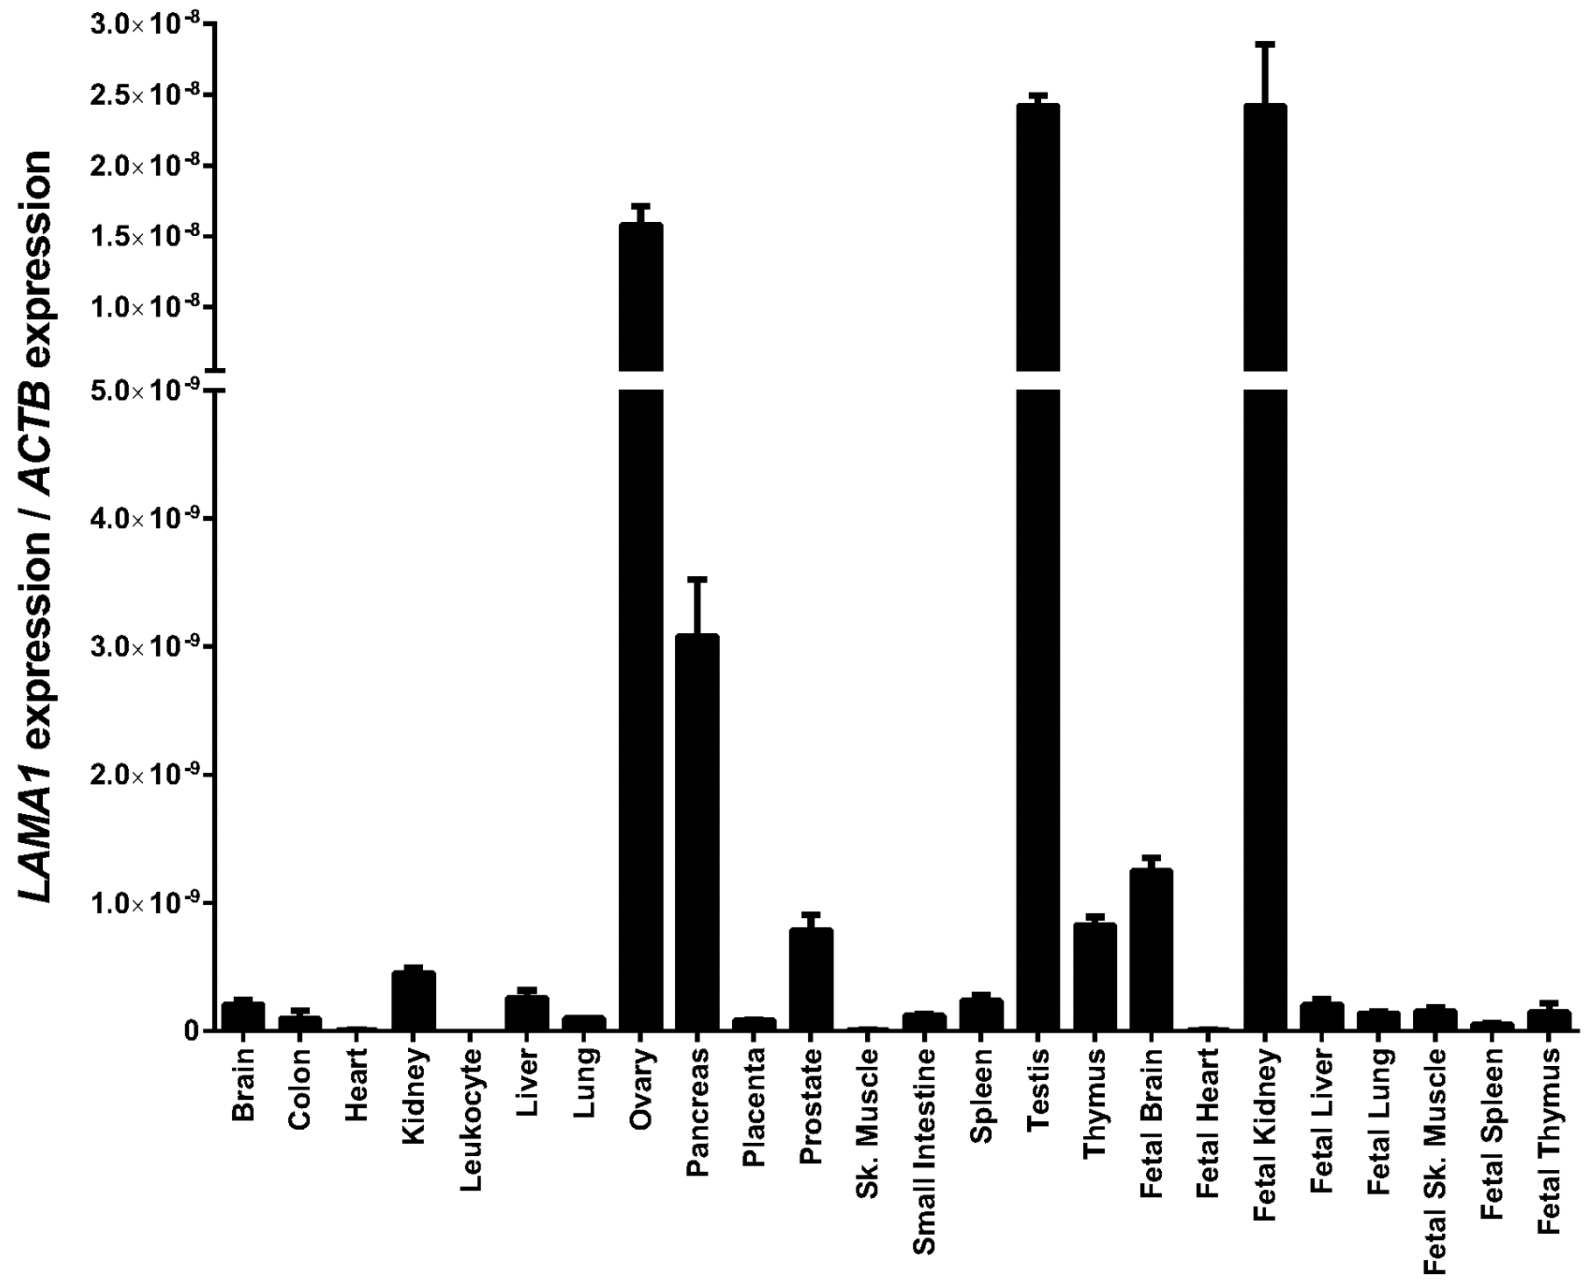

**B**

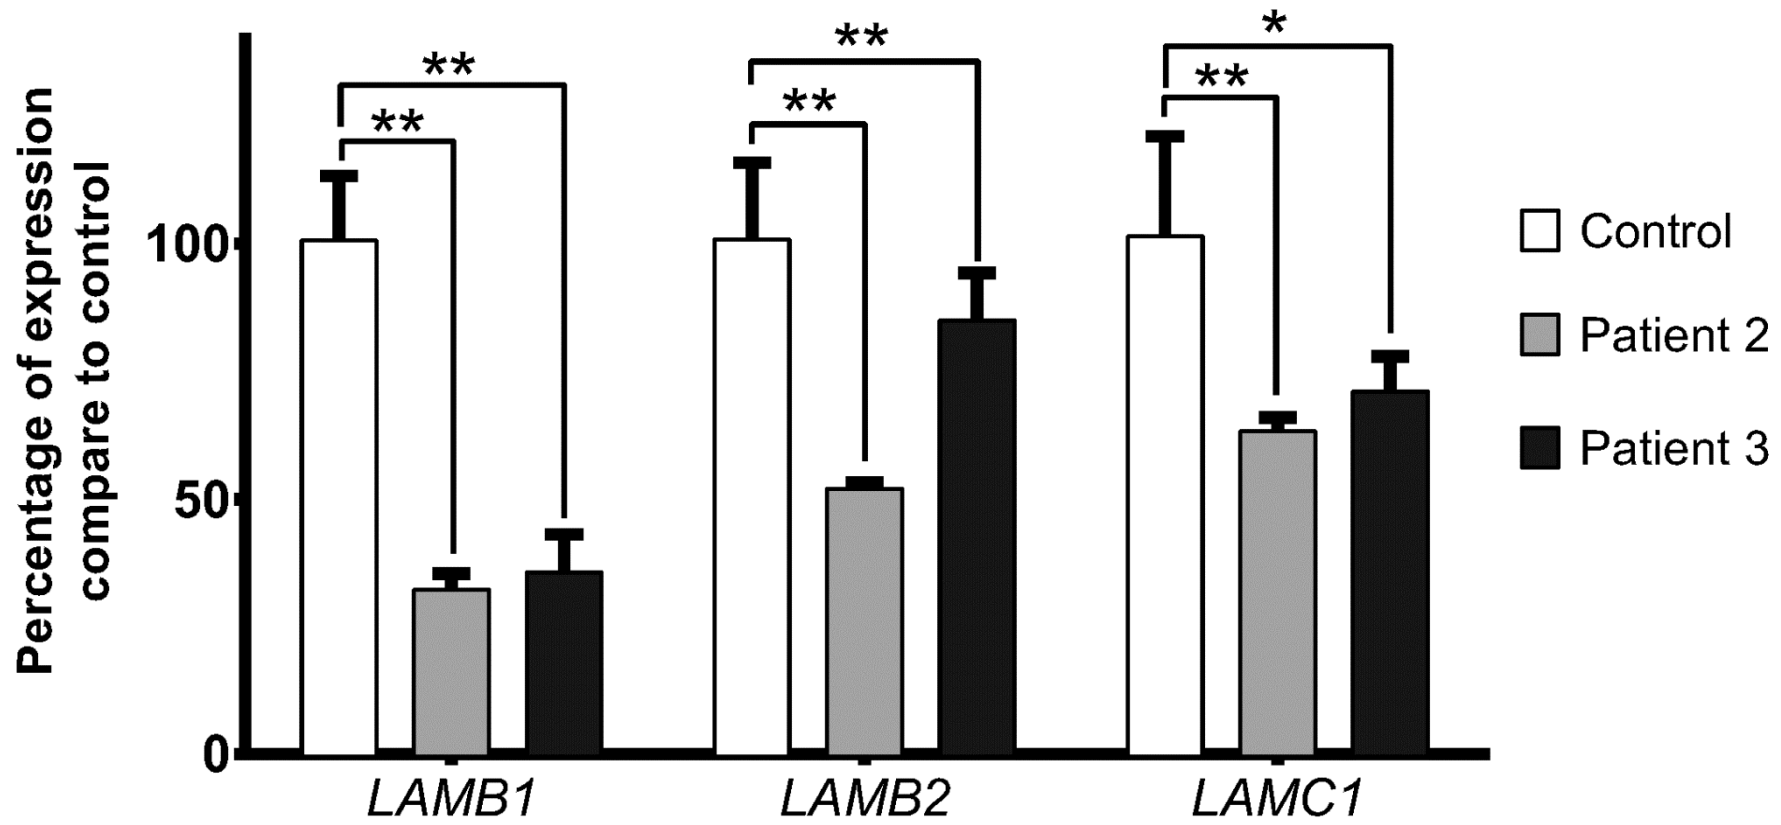

# Supplementary Figure 2

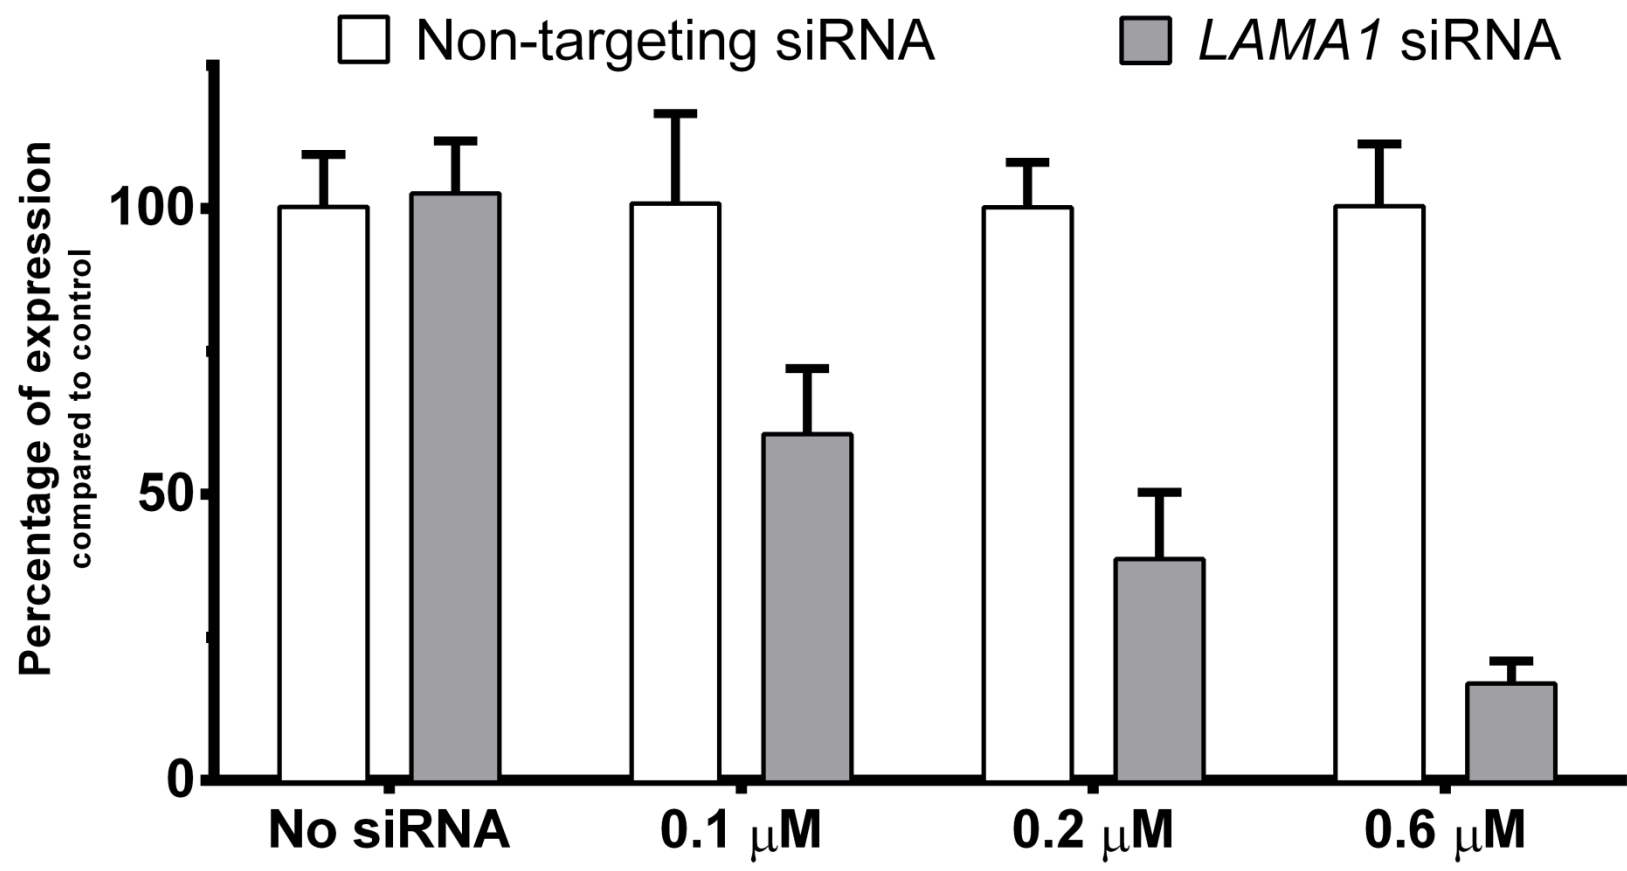

# Supplementary Figure 3

## A

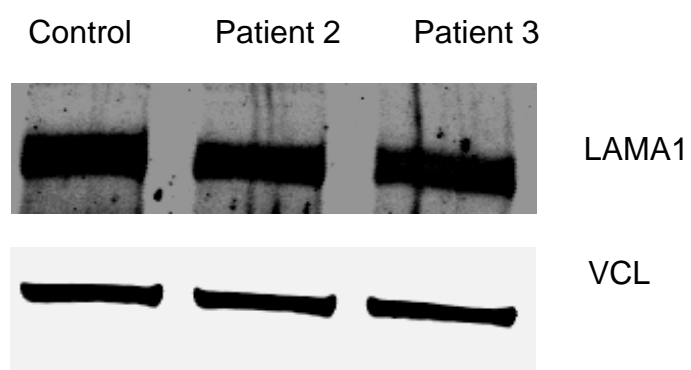

## B

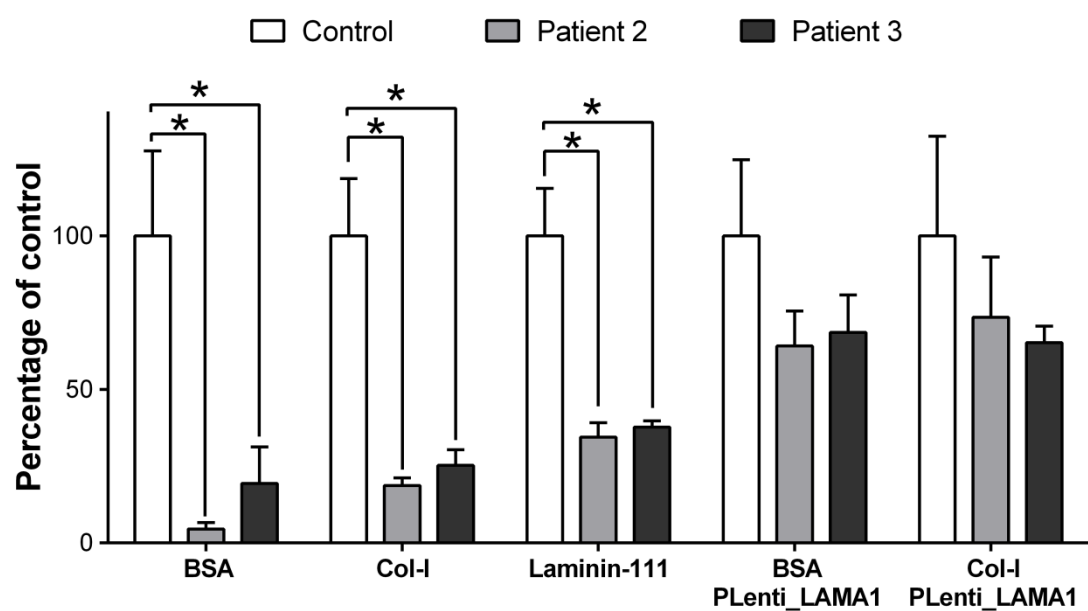

## C

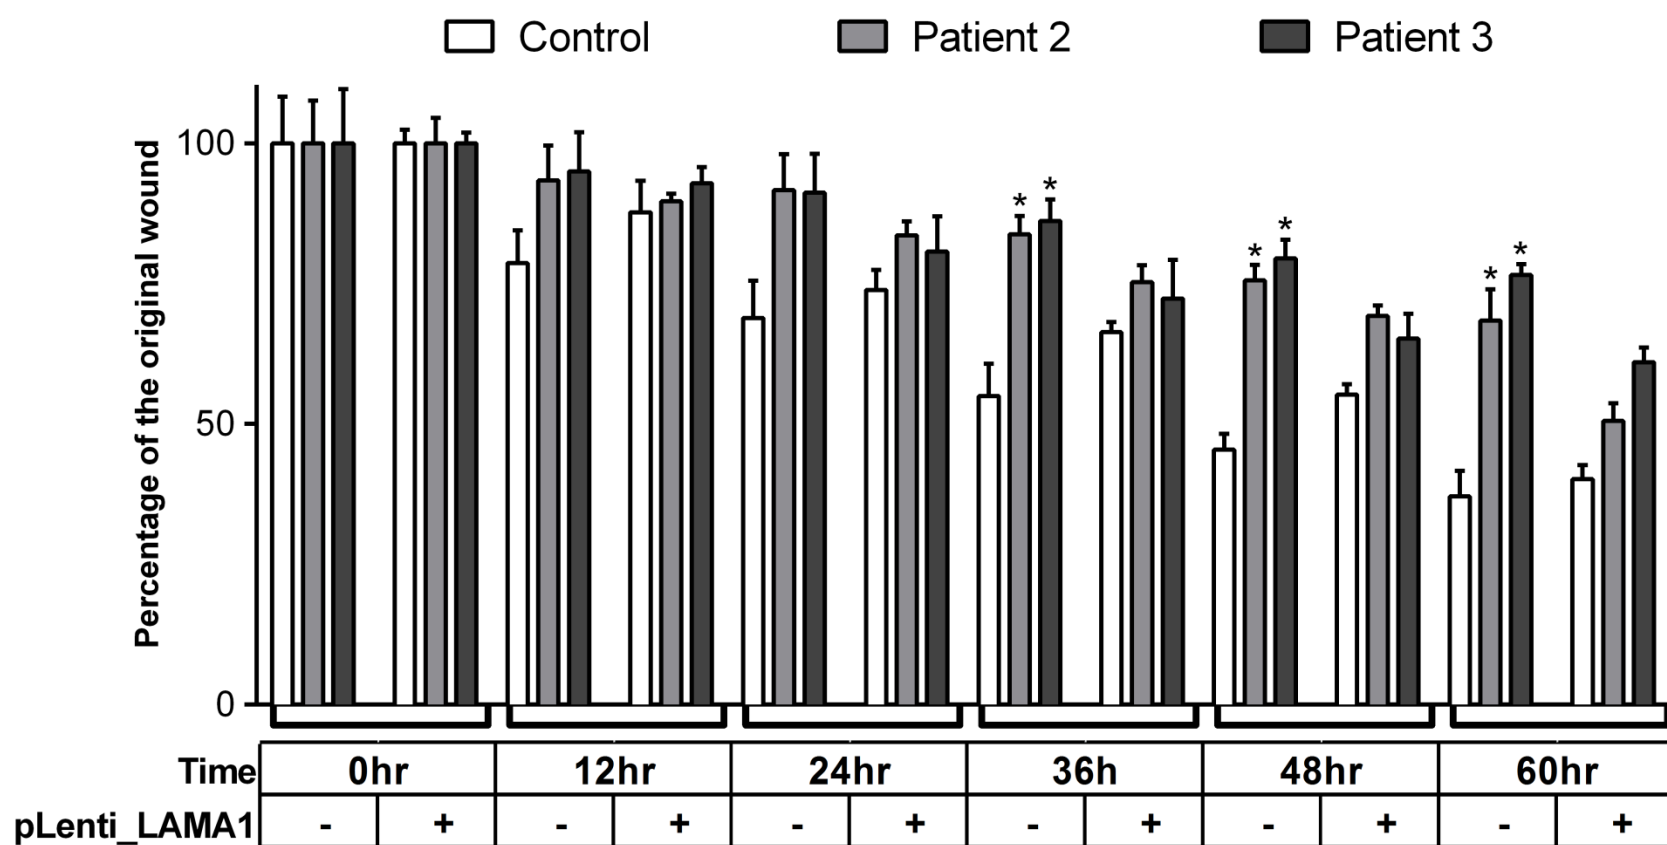

## D

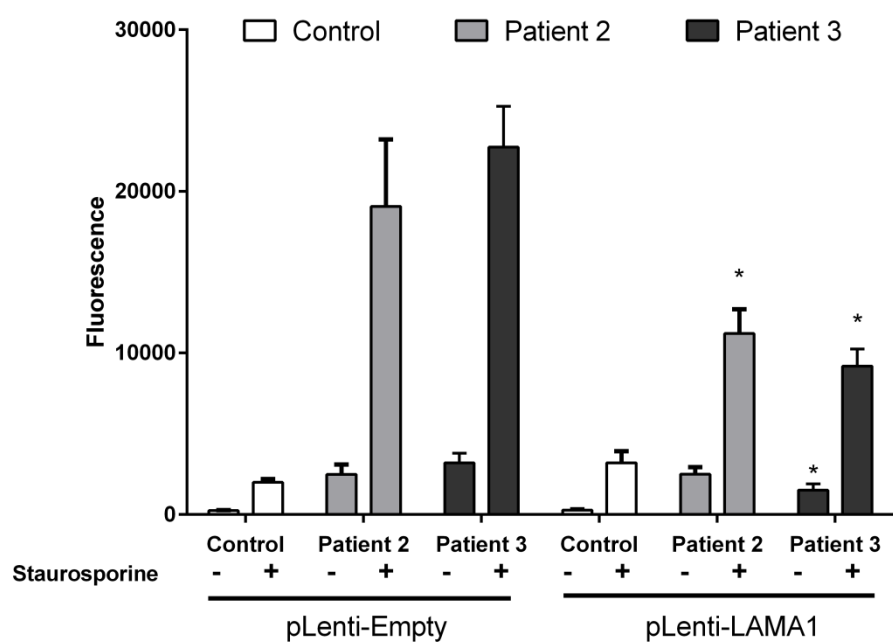

## E

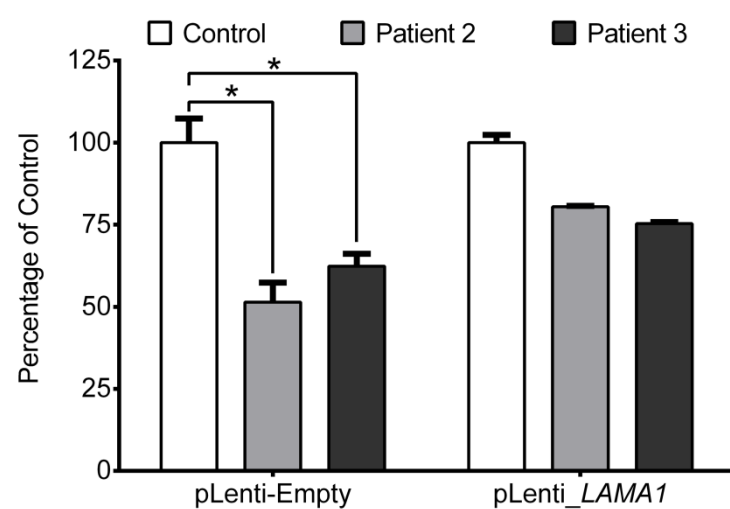

# Supplementary Figure 4

## A

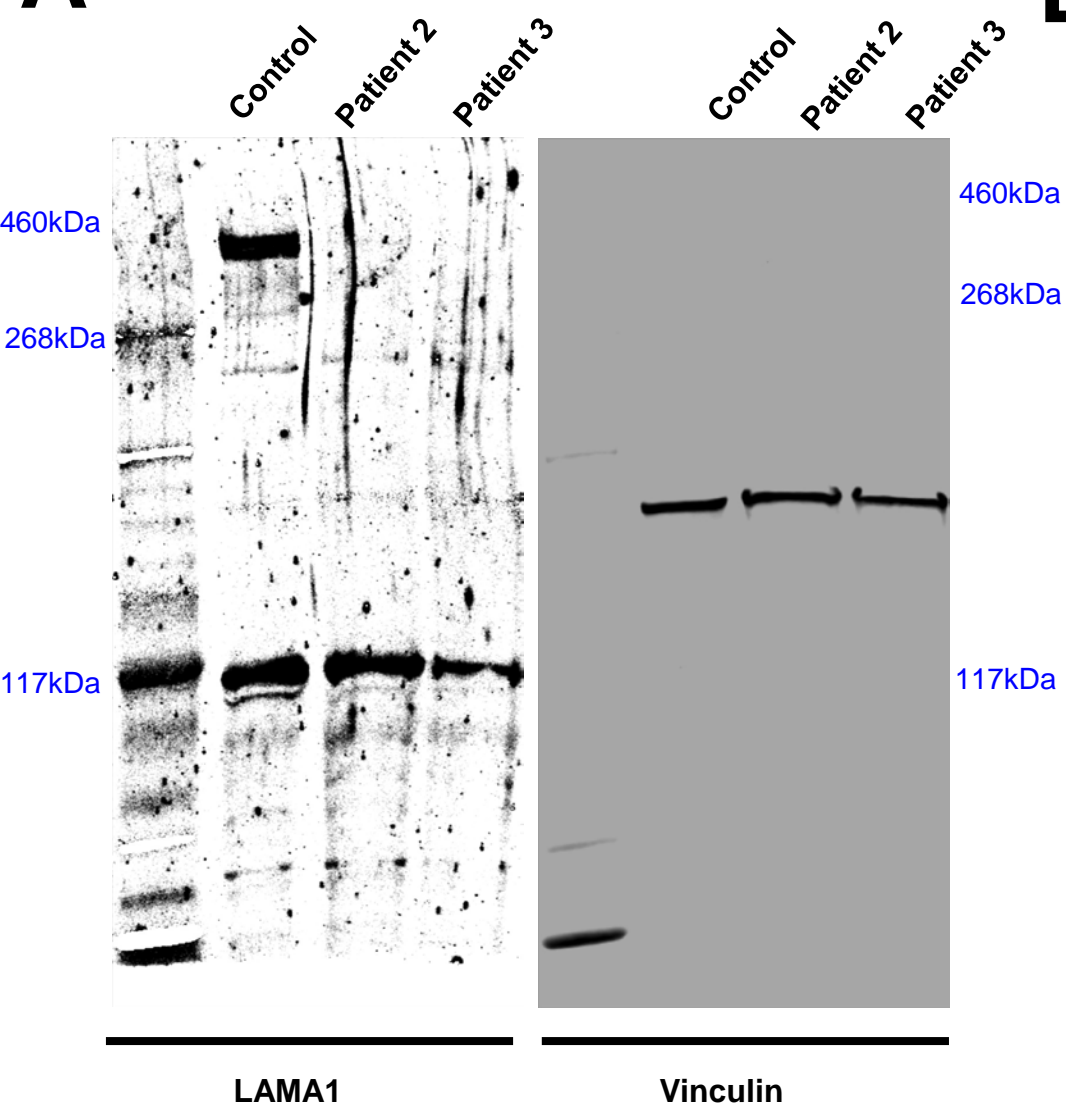

## B

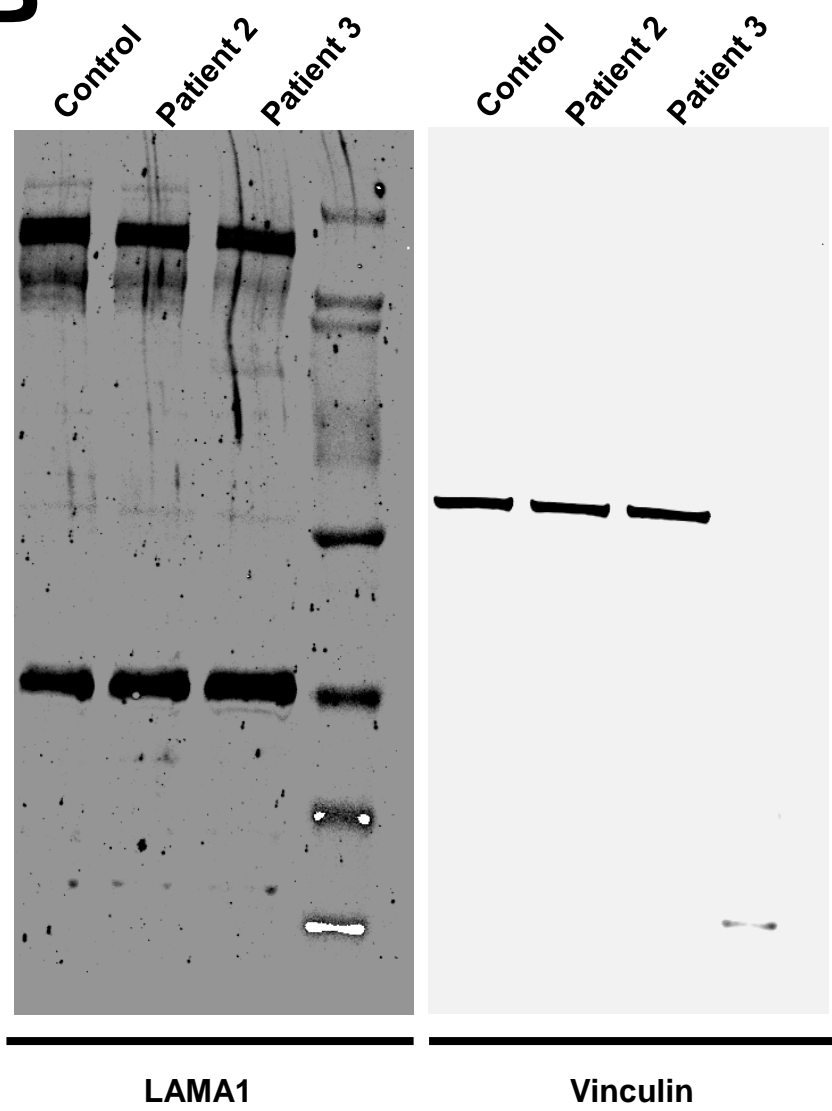

## C

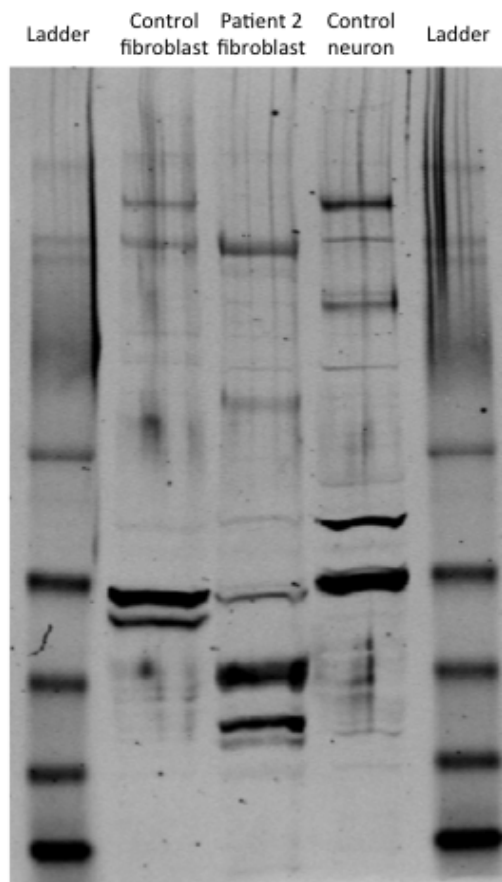

LAMA1

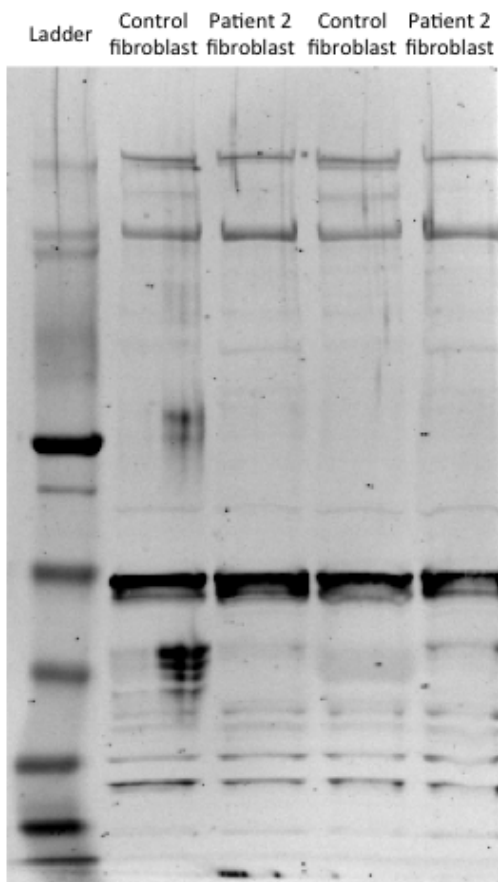

LAMA1 plus laminin-111

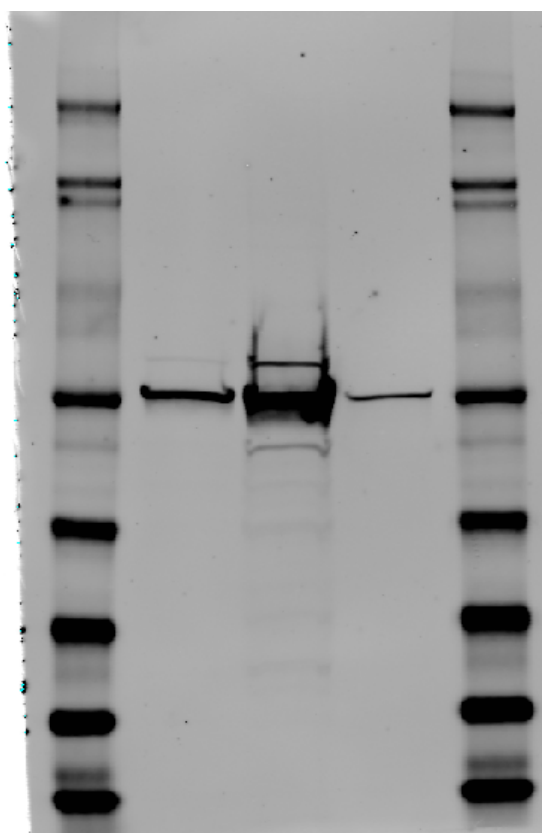

Vinculin

**supplementary video 1:**

Video illustration of involuntary tic movements in Patients 2 and Patient 3. In Patient 2, numerous simple tics are observed during casual examination. The movements are characterized by brief stereotyped “wrinkling” of the nose and elevation of the upper lip or eye rolling movements. Patient 3 movements are more complex, at times, in the form of complex bilateral “arm pumping” action. While both patients describe these movements as involuntary, both indicate a premonitory urge to move, which is relieved by the occurrence of the movements as typically seen in patients with motor tics.

**supplementary Videos 2a (left eye) and 2b (right eye):**

Video illustration of ocular motor assessment, gross abnormalities were observed on all tests with numerous saccadic intrusions documented during gaze holding.

**Supplementary table 1. Human disorders caused by laminin defects.**

| Gene         | Protein            | Human Disease                                                                           | Reference               |
|--------------|--------------------|-----------------------------------------------------------------------------------------|-------------------------|
| <i>LAMA1</i> | Laminin $\alpha$ 1 | Cystic cerebellar dysplasia associated with degenerative myopia                         | [1], and present report |
| <i>LAMA2</i> | Laminin $\alpha$ 2 | Congenital muscular dystrophy with diffuse cerebral gray and white matter abnormalities | [2]                     |
| <i>LAMA4</i> | Laminin $\alpha$ 4 | Dilated cardiomyopathy                                                                  | [3]                     |
| <i>LAMB1</i> | Laminin $\beta$ 1  | Cobblestone lissencephaly without ocular or muscular abnormalities                      | [4]                     |
| <i>LAMB2</i> | Laminin $\beta$ 2  | Nephrotic syndrome with or without ocular anomalies (Pierson syndrome)                  | [5]                     |
| <i>LAMA3</i> | Laminin $\alpha$ 3 | Epidermolysis bullosa                                                                   | [6]                     |
| <i>LAMB3</i> | Laminin $\beta$ 3  | Epidermolysis bullosa                                                                   | [7]                     |
| <i>LAMC1</i> | Laminin $\gamma$ 1 | Autosomal dominant Dandy-Walker malformation and occipital cephaloceles                 | [8]                     |
| <i>LAMC2</i> | Laminin $\gamma$ 2 | Epidermolysis bullosa                                                                   | [9]                     |
| <i>LAMC3</i> | Laminin $\gamma$ 3 | Cerebral cortical malformations, occipital                                              | [10]                    |



**Supplementary table 2: Genes associated with Tics and Anxiety**

| Disease                               | Genes and the defects associated         |                                | Reference        | Phenotype                                          |
|---------------------------------------|------------------------------------------|--------------------------------|------------------|----------------------------------------------------|
|                                       | Candidate genes associated (OMIM number) | Gene defects associated        |                  |                                                    |
| <b>Gilles De La Tourette Syndrome</b> | <i>PVRL3</i> (607147)                    | Missense                       | [11]             | Motor and vocal tics, Aggressive behavior          |
|                                       | <i>MRPL3</i> (607118)                    | Missense                       |                  |                                                    |
|                                       | <i>DNAJC13</i> (614334)                  | Missense                       |                  |                                                    |
|                                       | <i>OFCC1</i> (614287)                    | Frameshift, rare 3'UTR variant |                  |                                                    |
|                                       |                                          | Gene disruption                | [12]             |                                                    |
|                                       | <i>SLITRK1</i> (609678)                  |                                |                  |                                                    |
|                                       | <i>IMMP2L</i> (605977)                   | Gene disruption                | [13]             |                                                    |
|                                       | <i>CNTNAP2</i> (604569)                  | Missense                       | [14]             |                                                    |
|                                       | Hemizygous                               | [15]                           |                  |                                                    |
|                                       | <i>HDC</i> (142704)                      |                                |                  |                                                    |
|                                       | <i>NLGN4</i> (300427)                    | Deletion                       | [16]             |                                                    |
| <b>Primrose Syndrome</b>              | <i>ZBTB20</i> (606025)                   | Missense variations            | [17]             | Tics or anxieties, Aggression                      |
| <b>Choreo-acanthocytosis</b>          | <i>VPS13A</i> (605978)                   | Several variants               | [18], [19], [20] | Tics and anxieties, Dystonia                       |
| <b>Obsessive-Compulsive Disorder</b>  | <i>BDNF</i> (113505)                     | Several variants               | [21]             | Tic related Obsessive-compulsive disorder          |
|                                       | <i>HTR2A</i> (182135)                    | Promoter variant               | [22]             |                                                    |
|                                       | <i>SLC6A4</i> (182138)                   | Promoter variant               | [23], [24]       |                                                    |
| <b>Myoclonic Dystonia</b>             | <i>SGCE</i> (604149)                     | Several variants               | [25]             | Depression, Anxiety, Obsessive Compulsive Disorder |
|                                       |                                          | Missense                       | [26], [27]       |                                                    |
|                                       | <i>DRD2</i> (126450)                     |                                |                  |                                                    |
|                                       | <i>DYT1</i> (128100)                     | Small Deletion                 | [28]             |                                                    |
| <b>Basal Ganglia Calcification</b>    | <i>PDGFB</i> (190040)                    | Several variants               | [29]             | Motor tics, Dementia, Anxiety, Psychosis           |
| <b>Chorea, Benign Hereditary</b>      | <i>NKX2-1</i> (600635)                   | Whole gene deletion            | [30]             | Movements exacerbated by anxiety, Chorea           |
|                                       |                                          | Intron variant                 | [31]             |                                                    |

**Supplementary table 3.** Supplemental table 3. List of the potential null variants (HGVS nomenclature) identified in *LAMA1* (NM\_005559.3) from different databases (1000Genomes: [www.1000genomes.org](http://www.1000genomes.org), NHLBI Exome Sequencing Project: [evs.gs.washington.edu](http://evs.gs.washington.edu) and the Exome Aggregation Consortium: <http://exac.broadinstitute.org>) and their frequency when applicable. For each database, a frequency of loss of function (Corresponding to the sum of the frequencies) has been calculated. LoF: Loss of Function

| Variant name in database            | Frequency       |
|-------------------------------------|-----------------|
| <b>Exome Variant Server (EVS)</b>   |                 |
| c.858+1G>T; p.?                     | 0.000231        |
| c.1492_1493insC; p.Arg498Profs*13   | 0.00304         |
| c.2344C>T; p.Arg782*                | 0.000077        |
| c.4601_4607del; p.Ala1534Glyfs*13   | 0.000479        |
| c.5512C>T; p.Gln1838*               | 0.000077        |
| c.6008-2A>G; p.?                    | 0.000077        |
| c.8188C>T; p.Gln2730*               | 0.000077        |
| c.8737del; p.Asp2913Metfs*2         | 0.00008         |
| <b>LoF variants in EVS</b>          | <b>0.004138</b> |
| <b>1000 Genomes (1KG)</b>           |                 |
| c.858+1G>T; p.?                     | 0.000277        |
| c.6476dup; p.Ser2160*               | NA              |
| c.7452+2T>G; p.?                    | NA              |
| c.8207+2T>C; p.?                    | 0.000458        |
| c.8498_8499insA; p.Lys2832Glyfs*4   | NA              |
| c.8501_8502insC; p.Leu2835Phefs*33  | NA              |
| c.8904_8905insCC; p.Ala2969Profs*24 | 0.000719        |
| <b>LoF variants in 1KG</b>          | <b>0.001454</b> |

| Exome Aggregation Consortium (ExAC) |             |
|-------------------------------------|-------------|
| c.9084dup; p.Cys3029Metfs*19        | 0.000008291 |
| c.9067+1G>A; p.?                    | 0.00001655  |
| c.8777del; p.Asn2926Metfs*17        | 0.000008239 |
| c.8737del; p.Asp2913Metfs*2         | 0.000008241 |
| c.8629dup; p.Val2877Glyfs*20        | 0.000008241 |
| c.8608C>T; p.Gln2870*               | 0.000008243 |
| c.8550_8556dup; p.Ile2853Trpfs*17   | 0.000008249 |
| c.8556+1G>A; p.?                    | 0.000008249 |
| c.8208-1G>T; p.?                    | 0.000008848 |
| c.8207+2T>C; p.?                    | 0.00001052  |
| c.8192C>A; p.Ser2731*               | 0.000008837 |
| c.8095-2dup; p.?                    | 0.000008825 |
| c.8094+1G>A; p.?                    | 0.0000083   |
| c.7900dup; p.Thr2634Asnfs*33        | 0.000008238 |
| c.7779-1G>A; p.?                    | 0.00001666  |
| c.7779-2A>G; p.?                    | 0.000008341 |
| c.7627-1G>T; p.?                    | 0.000008364 |
| c.7514C>G; p.Ser2505*               | 0.000008271 |
| c.7338-2dupA; p.?                   | 0.000008238 |
| c.7338-1G>T; p.?                    | 0.000008238 |
| c.7246C>T; p.Gln2416*               | 0.000008238 |
| c.7243A>T; p.Lys2415*               | 0.000008239 |
| c.7195+2T>A; p.?                    | 0.000008237 |
| c.7180C>T; p.Arg2394*               | 0.00002471  |

|                                   |             |
|-----------------------------------|-------------|
| c.6899+2T>C; p.?                  | 0.000008239 |
| c.6517C>T; p.Arg2173*             | 0.000008455 |
| c.6490-2A>G; p.?                  | 0.000008985 |
| c.6489+1del; p.?                  | 0.000008241 |
| c.6299C>G; p.Ser2100*             | 0.000008252 |
| c.6190+2T>C; p.?                  | 0.000008236 |
| c.6008-2A>G; p.?                  | 0.000008273 |
| c.5796+1G>A; p.?                  | 0.00001648  |
| c.5706dup; p.Ala1903Serfs*12      | 0.000008238 |
| c.5661-1G>A; p.?                  | 0.000008249 |
| c.5661-1G>T; p.?                  | 0.000008249 |
| c.5497-1G>A; p.?                  | 0.000008238 |
| c.5169-2A>G; p.?                  | 0.000008299 |
| c.5119C>T; p.Gln1707*             | 0.000008237 |
| c.4957del; p.Glu1653Argfs*7       | 0.000008238 |
| c.4897-1G>A; p.?                  | 0.00001649  |
| c.4896+2T>C; p.?                  | 0.000008243 |
| c.4579C>T; p.Gln1527*             | 0.00001659  |
| c.4383-1G>C; p.?                  | 0.000008713 |
| c.4383-2A>C; p.?                  | 0.000008768 |
| c.4300_4303dup; p.Thr1435Metfs*15 | 0.00001655  |
| c.4257>A; p.Cys1419*              | 0.0000171   |
| c.4171_4172del; p.Arg1391Glyfs*19 | 0.0000251   |
| c.4023_4032dup; p.Lys1345Glyfs*6  | 0.000008238 |
| c.3919C>T; p.Arg1307*             | 0.00002472  |

|                                  |             |
|----------------------------------|-------------|
| c.3896_3897del; p.Ser1299Cysfs*3 | 0.000008255 |
| c.3687+1G>T; p.?                 | 0.000011116 |
| c.3479C>G; p.Ser1160*            | 0.0000131   |
| c.3476del; p.Cys1159Serfs*8      | 0.00001295  |
| c.3450C>A; p.Cys1150*            | 0.00001092  |
| c.3397C>T; p.Arg1133*            | 0.00001765  |
| c.3364-1G>A; p.?                 | 0.00001729  |
| c.3099G>A; p.Trp1033*            | 0.000008238 |
| c.3053dup; p.His1019Serfs*8      | 0.000008237 |
| c.3021C>A; p.Cys1007*            | 0.000008237 |
| c.2986del; p.Thr996Hisfs*28      | 0.00002472  |
| c.2935del; p.Arg979Glyfs*45      | 0.00000824  |
| c.2791C>T; p.Gln931*             | 0.000008604 |
| c.2754del; p.Leu920Serfs*8       | 0.000008336 |
| c.2702-1G>T; p.?                 | 0.000008993 |
| c.2487del; p.Arg830Aspfs*42      | 0.000008509 |
| c.2403-2A>G; p.?                 | 0.000009118 |
| c.2344C>T; p.Arg782*             | 0.00003628  |
| c.1957C>T; p.Gln653*             | 0.000008237 |
| c.1885C>T; p.Gln629*             | 0.000008237 |
| c.1583G>A; p.Trp528*             | 0.000008249 |
| c.976+2T>C; p.?                  | 0.000008237 |
| c.891C>A; p.Cys297*              | 0.000008238 |
| c.858+1G>T; p.?                  | 0.00009914  |
| c.733G>T; p.Glu245*              | 0.000008238 |

|                                |                    |
|--------------------------------|--------------------|
| c.730del; p.Arg244Glyfs*18     | 0.000008238        |
| c.505C>T; p.Arg169*            | 0.00001648         |
| c.448del; p.Gln150Serfs*16     | 0.000008238        |
| c.425del; p.Asp142Valfs*24     | 0.00000824         |
| c.404G>A; p.Trp135*            | 0.000008247        |
| c.391C>T; p.Arg131*            | 0.000008264        |
| c.381_382del; p.Asn128Cysfs*49 | 0.000008278        |
| c.307G>T; p.Glu103*            | 0.000008256        |
| c.184C>T; p.Arg62*             | 0.000008247        |
| c.11dup; p.Val5Argfs*66        | 0.00001018         |
| <b>LoF variants in ExAC</b>    | <b>0.000988909</b> |

## References

1. Aldinger KA, Mosca SJ, Tetreault M, Dempsey JC, Ishak GE, Hartley T, Phelps IG, Lamont RE, O'Day DR, Basel D, Gripp KW, Baker L, Stephan MJ, Bernier FP, Boycott KM, Majewski J, University of Washington Center for Mendelian G, Care4Rare C, Parboosingh JS, Innes AM, Doherty D. Mutations in LAMA1 cause cerebellar dysplasia and cysts with and without retinal dystrophy. *Am J Hum Genet* 2014;**95**(2):227-34. doi: 10.1016/j.ajhg.2014.07.007.
2. Oliveira J, Santos R, Soares-Silva I, Jorge P, Vieira E, Oliveira ME, Moreira A, Coelho T, Ferreira JC, Fonseca MJ, Barbosa C, Prats J, Ariztegui ML, Martins ML, Moreno T, Heinemann K, Barbot C, Pascual-Pascual SI, Cabral A, Fineza I, Santos M, Bronze-da-Rocha E. LAMA2 gene analysis in a cohort of 26 congenital muscular dystrophy patients. *Clin Genet* 2008;**74**(6):502-12. doi: 10.1111/j.1399-0004.2008.01068.x.
3. Knoll R, Postel R, Wang J, Kratzner R, Hennecke G, Vacaru AM, Vakeel P, Schubert C, Murthy K, Rana BK, Kube D, Knoll G, Schafer K, Hayashi T, Holm T, Kimura A, Schork N, Toliat MR, Nurnberg P, Schultheiss HP, Schaper W, Schaper J, Bos E, Den Hertog J, van Eeden FJ, Peters PJ, Hasenfuss G, Chien KR, Bakkers J. Laminin-alpha4 and integrin-linked kinase mutations cause human cardiomyopathy via simultaneous defects in cardiomyocytes and endothelial cells. *Circulation* 2007;**116**(5):515-25. doi: 10.1161/CIRCULATIONAHA.107.689984.
4. Radmanesh F, Caglayan AO, Silhavy JL, Yilmaz C, Cantagrel V, Omar T, Rosti B, Kaymakcalan H, Gabriel S, Li M, Sestan N, Bilguvar K, Dobyns WB, Zaki MS, Gunel M, Gleeson JG. Mutations in LAMB1 cause cobblestone brain malformation without muscular or ocular abnormalities. *Am J Hum Genet* 2013;**92**(3):468-74. doi: 10.1016/j.ajhg.2013.02.005.
5. Hasselbacher K, Wiggins RC, Matejas V, Hinkes BG, Mucha B, Hoskins BE, Ozaltin F, Nurnberg G, Becker C, Hangan D, Pohl M, Kuwertz-Broking E, Griebel M, Schumacher V, Royer-Pokora B, Bakkaloglu A, Nurnberg P, Zenker M, Hildebrandt F. Recessive missense mutations in LAMB2 expand the clinical spectrum of LAMB2-associated disorders. *Kidney Int* 2006;**70**(6):1008-12. doi: 10.1038/sj.ki.5001679.
6. Vidal F, Baudoin C, Miquel C, Galliano MF, Christiano AM, Uitto J, Ortonne JP, Meneguzzi G. Cloning of the laminin alpha 3 chain gene (LAMA3) and identification of a homozygous deletion in a patient with Herlitz junctional epidermolysis bullosa. *Genomics* 1995;**30**(2):273-80. doi: 10.1006/geno.1995.9877.
7. Pulkkinen L, Meneguzzi G, McGrath JA, Xu Y, Blanchet-Bardon C, Ortonne JP, Christiano AM, Uitto J. Predominance of the recurrent mutation R635X in the LAMB3 gene in European patients with Herlitz junctional epidermolysis bullosa has implications for mutation detection strategy. *J Invest Dermatol* 1997;**109**(2):232-7.
8. Darbro BW, Mahajan VB, Gakhar L, Skeie JM, Campbell E, Wu S, Bing X, Millen KJ, Dobyns WB, Kessler JA, Jalali A, Cremer J, Segre A, Manak JR, Aldinger KA, Suzuki S, Natsume N, Ono M, Hai HD, Viet le T, Loddo S, Valente EM, Bernardini L, Ghonge N, Ferguson PJ, Bassuk AG. Mutations in extracellular matrix genes NID1 and LAMC1 cause autosomal dominant Dandy-Walker malformation and occipital cephaloceles. *Human mutation* 2013;**34**(8):1075-9. doi: 10.1002/humu.22351.
9. Nakano A, Chao SC, Pulkkinen L, Murrell D, Bruckner-Tuderman L, Pfendner E, Uitto J. Laminin 5 mutations in junctional epidermolysis bullosa: molecular basis of Herlitz vs. non-Herlitz phenotypes. *Hum Genet* 2002;**110**(1):41-51. doi: 10.1007/s00439-001-0630-1.
10. Barak T, Kwan KY, Louvi A, Demirbilek V, Saygi S, Tuysuz B, Choi M, Boyaci H, Doerschner K, Zhu Y, Kaymakcalan H, Yilmaz S, Bakircioglu M, Caglayan AO, Ozturk AK, Yasuno K, Brunken WJ, Atalar E, Yalcinkaya C, Dincer A, Bronen RA, Mane S, Ozcelik T, Lifton RP, Sestan N, Bilguvar K, Gunel M.

- Recessive LAMC3 mutations cause malformations of occipital cortical development. *Nat Genet* 2011;**43**(6):590-4. doi: 10.1038/ng.836.
11. Sundaram SK, Huq AM, Sun Z, Yu W, Bennett L, Wilson BJ, Behen ME, Chugani HT. Exome sequencing of a pedigree with Tourette syndrome or chronic tic disorder. *Ann Neurol* 2011;**69**(5):901-4. doi: 10.1002/ana.22398.
  12. Abelson JF, Kwan KY, O'Roak BJ, Baek DY, Stillman AA, Morgan TM, Mathews CA, Pauls DL, Rasin MR, Gunel M, Davis NR, Ercan-Sencicek AG, Guez DH, Spertus JA, Leckman JF, Dure LSt, Kurlan R, Singer HS, Gilbert DL, Farhi A, Louvi A, Lifton RP, Sestan N, State MW. Sequence variants in SLITRK1 are associated with Tourette's syndrome. *Science* 2005;**310**(5746):317-20. doi: 10.1126/science.1116502.
  13. Petek E, Windpassinger C, Vincent JB, Cheung J, Boright AP, Scherer SW, Kroisel PM, Wagner K. Disruption of a novel gene (IMMP2L) by a breakpoint in 7q31 associated with Tourette syndrome. *Am J Hum Genet* 2001;**68**(4):848-58. doi: 10.1086/319523.
  14. Verkerk AJ, Mathews CA, Joosse M, Eussen BH, Heutink P, Oostra BA. CNTNAP2 is disrupted in a family with Gilles de la Tourette syndrome and obsessive compulsive disorder. *Genomics* 2003;**82**(1):1-9.
  15. Ercan-Sencicek AG, Stillman AA, Ghosh AK, Bilguvar K, O'Roak BJ, Mason CE, Abbott T, Gupta A, King RA, Pauls DL, Tischfield JA, Heiman GA, Singer HS, Gilbert DL, Hoekstra PJ, Morgan TM, Loring E, Yasuno K, Fernandez T, Sanders S, Louvi A, Cho JH, Mane S, Colangelo CM, Biederer T, Lifton RP, Gunel M, State MW. L-histidine decarboxylase and Tourette's syndrome. *The New England journal of medicine* 2010;**362**(20):1901-8. doi: 10.1056/NEJMoa0907006.
  16. Lawson-Yuen A, Saldivar JS, Sommer S, Picker J. Familial deletion within NLGN4 associated with autism and Tourette syndrome. *European journal of human genetics : EJHG* 2008;**16**(5):614-8. doi: 10.1038/sj.ejhg.5202006.
  17. Cordeddu V, Redeker B, Stellacci E, Jongejan A, Fragale A, Bradley TE, Anselmi M, Ciolfi A, Cecchetti S, Muto V, Bernardini L, Azage M, Carvalho DR, Espay AJ, Male A, Molin AM, Posmyk R, Battisti C, Casertano A, Melis D, van Kampen A, Baas F, Mannens MM, Bocchinfuso G, Stella L, Tartaglia M, Hennekam RC. Mutations in ZBTB20 cause Primrose syndrome. *Nat Genet* 2014;**46**(8):815-7. doi: 10.1038/ng.3035.
  18. Betsholtz C, Klein C, Oliveira JR, Ueno S, Maruki Y, Nakamura M, Tomemori Y, Kamae K, Tanabe H, Yamashita Y, Matsuda S, Kaneko S, Sano A. The gene encoding a newly discovered protein, chorein, is mutated in chorea-acanthocytosis. *Nat Genet* 2001;**28**(2):121-2. doi: 10.1038/ng.2723.
  19. Dobson-Stone C, Danek A, Rampoldi L, Hardie RJ, Chalmers RM, Wood NW, Bohlega S, Dotti MT, Federico A, Shizuka M, Tanaka M, Watanabe M, Ikeda Y, Brin M, Goldfarb LG, Karp BI, Mohiddin S, Fananapazir L, Storch A, Fryer AE, Maddison P, Sibon I, Trevisol-Bittencourt PC, Singer C, Caballero IR, Aasly JO, Schmierer K, Dengler R, Hiersemenzel LP, Zeviani M, Meiner V, Lossos A, Johnson S, Mercado FC, Sorrentino G, Dupre N, Rouleau GA, Volkmann J, Arpa J, Lees A, Geraud G, Chouinard S, Nemeth A, Monaco AP. Mutational spectrum of the CHAC gene in patients with chorea-acanthocytosis. *European journal of human genetics : EJHG* 2002;**10**(11):773-81. doi: 10.1038/sj.ejhg.5200866.
  20. Saiki S, Sakai K, Kitagawa Y, Saiki M, Kataoka S, Hirose G. Mutation in the CHAC gene in a family of autosomal dominant chorea-acanthocytosis. *Neurology* 2003;**61**(11):1614-6.
  21. Hall D, Dhillia A, Charalambous A, Gogos JA, Karayiorgou M. Sequence variants of the brain-derived neurotrophic factor (BDNF) gene are strongly associated with obsessive-compulsive disorder. *Am J Hum Genet* 2003;**73**(2):370-6. doi: 10.1086/377003.



22. Enoch MA, Kaye WH, Rotondo A, Greenberg BD, Murphy DL, Goldman D. 5-HT2A promoter polymorphism -1438G/A, anorexia nervosa, and obsessive-compulsive disorder. *Lancet* 1998;**351**(9118):1785-6. doi: 10.1016/s0140-6736(05)78746-8.
23. Hu XZ, Lipsky RH, Zhu G, Akhtar LA, Taubman J, Greenberg BD, Xu K, Arnold PD, Richter MA, Kennedy JL, Murphy DL, Goldman D. Serotonin transporter promoter gain-of-function genotypes are linked to obsessive-compulsive disorder. *Am J Hum Genet* 2006;**78**(5):815-26. doi: 10.1086/503850.
24. Ozaki N, Goldman D, Kaye WH, Plotnicov K, Greenberg BD, Lappalainen J, Rudnick G, Murphy DL. Serotonin transporter missense mutation associated with a complex neuropsychiatric phenotype. *Molecular psychiatry* 2003;**8**(11):933-6. doi: 10.1038/sj.mp.4001365.
25. Zimprich A, Grabowski M, Asmus F, Naumann M, Berg D, Bertram M, Scheidtmann K, Kern P, Winkelmann J, Muller-Myhsok B, Riedel L, Bauer M, Muller T, Castro M, Meitinger T, Strom TM, Gasser T. Mutations in the gene encoding epsilon-sarcoglycan cause myoclonus-dystonia syndrome. *Nat Genet* 2001;**29**(1):66-9. doi: 10.1038/ng709.
26. Doheny DO, Brin MF, Morrison CE, Smith CJ, Walker RH, Abbasi S, Muller B, Garrels J, Liu L, De Carvalho Aguiar P, Schilling K, Kramer P, De Leon D, Raymond D, Saunders-Pullman R, Klein C, Bressman SB, Schmand B, Tijssen MA, Ozelius LJ, Silverman JM. Phenotypic features of myoclonus-dystonia in three kindreds. *Neurology* 2002;**59**(8):1187-96.
27. Klein C, Brin MF, Kramer P, Sena-Esteves M, de Leon D, Doheny D, Bressman S, Fahn S, Breakefield XO, Ozelius LJ. Association of a missense change in the D2 dopamine receptor with myoclonus dystonia. *Proc Natl Acad Sci U S A* 1999;**96**(9):5173-6.
28. Leung JC, Klein C, Friedman J, Vieregge P, Jacobs H, Doheny D, Kamm C, DeLeon D, Pramstaller PP, Penney JB, Eisengart M, Jankovic J, Gasser T, Bressman SB, Corey DP, Kramer P, Brin MF, Ozelius LJ, Breakefield XO. Novel mutation in the TOR1A (DYT1) gene in atypical early onset dystonia and polymorphisms in dystonia and early onset parkinsonism. *Neurogenetics* 2001;**3**(3):133-43.
29. Keller A, Westenberger A, Sobrido MJ, Garcia-Murias M, Domingo A, Sears RL, Lemos RR, Ordonez-Ugalde A, Nicolas G, da Cunha JE, Rushing EJ, Hugelshofer M, Wurnig MC, Kaech A, Reimann R, Lohmann K, Dobricic V, Carracedo A, Petrovic I, Miyasaki JM, Abakumova I, Mae MA, Raschperger E, Zatz M, Zschiedrich K, Klepper J, Spiteri E, Prieto JM, Navas I, Preuss M, Dering C, Jankovic M, Paucar M, Svenningsson P, Saliminejad K, Khorshid HR, Novakovic I, Aguzzi A, Boss A, Le Ber I, Defer G, Hannequin D, Kostic VS, Champion D, Geschwind DH, Coppola G. Mutations in the gene encoding PDGF-B cause brain calcifications in humans and mice. 2013;**45**(9):1077-82. doi: 10.1038/ng.2723.
30. Breedveld GJ, van Dongen JW, Danesino C, Guala A, Percy AK, Dure LS, Harper P, Lazarou LP, van der Linde H, Joosse M, Gruters A, MacDonald ME, de Vries BB, Arts WF, Oostra BA, Krude H, Heutink P. Mutations in TITF-1 are associated with benign hereditary chorea. *Hum Mol Genet* 2002;**11**(8):971-9.
31. Kleiner-Fisman G, Rogaeva E, Halliday W, Houle S, Kawarai T, Sato C, Medeiros H, St George-Hyslop PH, Lang AE. Benign hereditary chorea: clinical, genetic, and pathological findings. *Ann Neurol* 2003;**54**(2):244-7. doi: 10.1002/ana.10637.
